# Supplementary material
Source: publisher figshare collection journal article supplement (https://asha.figshare.com/articles/dataset/_/12606311)
Supplement: Supplementary file 1 [file 1]

**Supplemental Material S1.** Stimuli used in Experiment 1: Normatively associated word pairs.

| <b>Unrelated prime</b> | <b>Related prime</b> | <b>Target</b>  |
|------------------------|----------------------|----------------|
| House                  | Leg                  | <b>Arm</b>     |
| Suds                   | Crafts               | <b>Art</b>     |
| Knob                   | Front                | <b>Back</b>    |
| Sap                    | Spine                | <b>Back</b>    |
| Meow                   | Bounce               | <b>Ball</b>    |
| Pork                   | Sand                 | <b>Beach</b>   |
| Spoon                  | Chirp                | <b>Bird</b>    |
| Seat                   | Nest                 | <b>Bird</b>    |
| Quack                  | Row                  | <b>Boat</b>    |
| Arm                    | Ship                 | <b>Boat</b>    |
| Filth                  | Text                 | <b>Book</b>    |
| Cat                    | Scout                | <b>Boy</b>     |
| Soil                   | Girl                 | <b>Boy</b>     |
| Oak                    | Groom                | <b>Bride</b>   |
| Stone                  | Comb                 | <b>Brush</b>   |
| South                  | Meow                 | <b>Cat</b>     |
| Job                    | Dog                  | <b>Cat</b>     |
| East                   | Seat                 | <b>Chair</b>   |
| Rake                   | Wear                 | <b>Clothes</b> |
| Nest                   | Cob                  | <b>Corn</b>    |
| Lamp                   | Moo                  | <b>Cow</b>     |
| Sand                   | Calf                 | <b>Cow</b>     |
| Front                  | Mum                  | <b>Dad</b>     |
| King                   | Soil                 | <b>Dirt</b>    |
| Quiz                   | Filth                | <b>Dirt</b>    |
| Bulb                   | Pet                  | <b>Dog</b>     |

| <b>Unrelated prime</b> | <b>Related prime</b> | <b>Target</b> |
|------------------------|----------------------|---------------|
| Ship                   | Cat                  | <b>Dog</b>    |
| Calf                   | Hinge                | <b>Door</b>   |
| Bride                  | Knob                 | <b>Door</b>   |
| Girl                   | Quack                | <b>Duck</b>   |
| Groom                  | Bait                 | <b>Fish</b>   |
| Boy                    | Tile                 | <b>Floor</b>  |
| Queen                  | Spoon                | <b>Fork</b>   |
| Moo                    | Back                 | <b>Front</b>  |
| Clock                  | Boy                  | <b>Girl</b>   |
| Bed                    | Vine                 | <b>Grape</b>  |
| Text                   | Bride                | <b>Groom</b>  |
| Tile                   | Glove                | <b>Hand</b>   |
| Chirp                  | Cap                  | <b>Hat</b>    |
| Cob                    | House                | <b>Home</b>   |
| Scout                  | Honk                 | <b>Horn</b>   |
| Thigh                  | Queen                | <b>King</b>   |
| Wear                   | Rake                 | <b>Leaves</b> |
| Cap                    | Arm                  | <b>Leg</b>    |
| Nap                    | Thigh                | <b>Leg</b>    |
| Mum                    | Bulb                 | <b>Light</b>  |
| Pet                    | Lamp                 | <b>Light</b>  |
| Honk                   | Dad                  | <b>Mum</b>    |
| Black                  | South                | <b>North</b>  |
| Row                    | Ink                  | <b>Pen</b>    |
| Glove                  | Pork                 | <b>Pig</b>    |
| Dad                    | Stone                | <b>Rock</b>   |

| <b>Unrelated prime</b> | <b>Related prime</b> | <b>Target</b> |
|------------------------|----------------------|---------------|
| Gums                   | Socks                | <b>Shoes</b>  |
| Ink                    | Bed                  | <b>Sleep</b>  |
| Vine                   | Nap                  | <b>Sleep</b>  |
| Crafts                 | Suds                 | <b>Soap</b>   |
| Comb                   | North                | <b>South</b>  |
| Socks                  | Gums                 | <b>Teeth</b>  |

| <b>Unrelated prime</b> | <b>Related prime</b> | <b>Target</b> |
|------------------------|----------------------|---------------|
| Spine                  | Quiz                 | <b>Test</b>   |
| Leg                    | Clock                | <b>Time</b>   |
| Bait                   | Sap                  | <b>Tree</b>   |
| Hinge                  | Oak                  | <b>Tree</b>   |
| Dog                    | East                 | <b>West</b>   |
