# Supplementary material
Source: publisher figshare collection journal article supplement (https://asha.figshare.com/articles/dataset/_/12606311)
Supplement: Supplementary file 2 [file 1]

**Supplemental Material S2.** Stimuli used in Experiment 2: Congruent and incongruent sentences.

| <b>Incongruent sentence frame</b>                  | <b>Congruent sentence frame</b>                 | <b>Target</b> |
|----------------------------------------------------|-------------------------------------------------|---------------|
| <b>At night the old woman locked the</b>           | She plays the guitar so she joined the          | Band          |
| <b>I roasted marshmallows over the</b>             | She saved some money in her piggy-              | Bank          |
| <b>In the quiet cinema the man's phone</b>         | When the thief entered the house the dog        | Barked        |
| <b>The children ran outside to</b>                 | In spring flowers                               | Bloom         |
| <b>She jumped in the pool and made a big</b>       | The student went to the library to read a       | Book          |
| <b>His father is the coach of the football</b>     | She went to the bakery for a loaf of            | Bread         |
| <b>He washed his hands with water and</b>          | For his wife's birthday he baked a              | Cake          |
| <b>In autumn leaves fall off the</b>               | There were candles on the birthday              | Cake          |
| <b>Mother hung the painting up on the</b>          | The farmer spent the morning milking the        | Cows          |
| <b>She is afraid of the sea because she cannot</b> | The movie was so sad it made me                 | Cry           |
| <b>In spring flowers</b>                           | When babies are hungry they often               | Cry           |
| <b>I put the kettle on to make a hot cup of</b>    | The dentist says to brush your teeth twice<br>a | Day           |
| <b>She washed the dirty dishes in the</b>          | I prefer cats rather than                       | Dogs          |
| <b>The clouds are high up in the</b>               | I had no key to open the                        | Door          |
| <b>Most cats see very well at</b>                  | At night the old woman locked the               | Door          |
| <b>Today the baby spoke his first</b>              | She got out of the car and closed the           | Door          |
| <b>The letter was sent by</b>                      | For breakfast he ate scrambled                  | Eggs          |
| <b>There were candles on the birthday</b>          | She put on her sunglasses to protect her        | Eyes          |
| <b>She went to the bakery for a loaf of</b>        | They raised pigs on their                       | Farm          |
| <b>The hungry baby wanted to drink</b>             | I roasted marshmallows over the                 | Fire          |
| <b>I had no key to open the</b>                    | He went to the lake to catch                    | Fish          |
| <b>She waited for the phone to</b>                 | The baby bird was ready to learn to             | Fly           |
| <b>She accidentally tripped and fell down the</b>  | It was windy enough to fly a                    | Kite          |

| <b>Incongruent sentence frame</b>                    | <b>Congruent sentence frame</b>               | <b>Target</b> |
|------------------------------------------------------|-----------------------------------------------|---------------|
| <b>He took his dog out for a</b>                     | At dinner he cut his steak with a             | Knife         |
| <b>She wore a necklace around her</b>                | The hungry baby wanted to drink               | Milk          |
| <b>He looked up at night to see a sky full of</b>    | He was tired and in a bad                     | Mood          |
| <b>When driving you should keep your eyes on the</b> | To hang the picture you need a hammer and     | Nail          |
| <b>She saved some money in her piggy-</b>            | I could not remember his                      | Name          |
| <b>The princess may someday become a</b>             | She wore a necklace around her                | Neck          |
| <b>He cannot post the letter without attaching a</b> | The baby birds were in the                    | Nest          |
| <b>The student went to the library to read a</b>     | Most cats see very well at                    | Night         |
| <b>I had no umbrella as it began to</b>              | The children ran outside to                   | Play          |
| <b>For breakfast he ate scrambled</b>                | The letter was sent by                        | Post          |
| <b>At dinner he cut his steak with a</b>             | The princess can only marry a                 | Prince        |
| <b>The baby birds were in the</b>                    | The princess may someday become a             | Queen         |
| <b>The movie was so sad it made me</b>               | I had no umbrella as it began to              | Rain          |
| <b>When the thief entered the house the dog</b>      | In the quiet cinema the man's phone           | Rang          |
| <b>The baby bird was ready to learn to</b>           | She waited for the phone to                   | Ring          |
| <b>The dentist says to brush your teeth twice a</b>  | When driving you should keep your eyes on the | Road          |
| <b>It was windy enough to fly a</b>                  | She washed the dirty dishes in the            | Sink          |
| <b>I prefer cats rather than</b>                     | The clouds are high up in the                 | Sky           |
| <b>She put on her sunglasses to protect her</b>      | He washed his hands with water and            | Soap          |
| <b>She forgot her watch so she asked for the</b>     | She jumped in the pool and made a big         | Splash        |
| <b>He went to the lake to catch</b>                  | She accidentally tripped and fell down the    | Stairs        |
| <b>THE princess can only marry a</b>                 | He cannot post the letter without attaching a | Stamp         |
| <b>She got out of the car and closed the</b>         | He looked up at night to see a sky full of    | Stars         |
| <b>When babies are hungry they often</b>             | She is afraid of the sea because she cannot   | Swim          |
| <b>The genie promised to grant the man one</b>       | I put the kettle on to make a hot cup of      | Tea           |

| <b>Incongruent sentence frame</b>                | <b>Congruent sentence frame</b>           | <b>Target</b> |
|--------------------------------------------------|-------------------------------------------|---------------|
| <b>They raised pigs on their</b>                 | His father is the coach of the football   | Team          |
| <b>She plays the guitar so she joined the</b>    | The dentist opened his mouth to check his | Teeth         |
| <b>I could not remember his</b>                  | She forgot her watch so she asked for the | Time          |
| <b>The farmer spent the morning milking the</b>  | In autumn leaves fall off the             | Trees         |
| <b>The dentist opened his mouth to check his</b> | He took his dog out for a                 | Walk          |
| <b>He was tired and in a bad</b>                 | Mother hung the painting up on the        | Wall          |
| <b>To hang the picture you need a hammer and</b> | The genie promised to grant the man one   | Wish          |
| <b>For his wife's birthday he baked a</b>        | Today the baby spoke his first            | Word          |
